# Supplementary material for: Molecular orientation of organic thin films on dielectric solid substrates: a phase-sensitive vibrational SFG study
Source: Royal Society of Chemistry journal article supplement (doi:10.1039/c5cp02702k), 2015-01-01
Supplement: c5cp02702k1.pdf [file c5cp02702k1.pdf]

*Supporting Information for*

**Molecular Orientation of Organic Thin Films on Dielectric Solid  
Substrates: A Phase-sensitive Vibrational SFG Study**

Aimin Ge<sup>†</sup>, Qiling Peng<sup>†</sup>, Lin Qiao<sup>†</sup>, Nageshwar R. Yepuri,<sup>¶</sup> Tamim A. Darwish,<sup>¶</sup> Michiya  
Matsusaki<sup>‡</sup>, Mitsuru Akashi<sup>‡</sup>, and Shen Ye<sup>\*†</sup>

<sup>†</sup>*Catalysis Research Center, Hokkaido University, Sapporo 001-0021, Japan*

<sup>‡</sup>*Department of Applied Chemistry, Graduate School of Engineering, Osaka University,  
Osaka 565-0871, Japan*

<sup>¶</sup>*National Deuteration Facility, Australian Nuclear Science and Technology Organization  
(ANSTO), Locked Bag 2001, Kirrawee DC, New South Wales 2232, Australia*

## 1. Synthesis of Partially deuterated octadecyltrichlorosilane ( $\text{CD}_3(\text{CD}_2)_{16}(\text{CH}_2)\text{SiCl}_3$ )

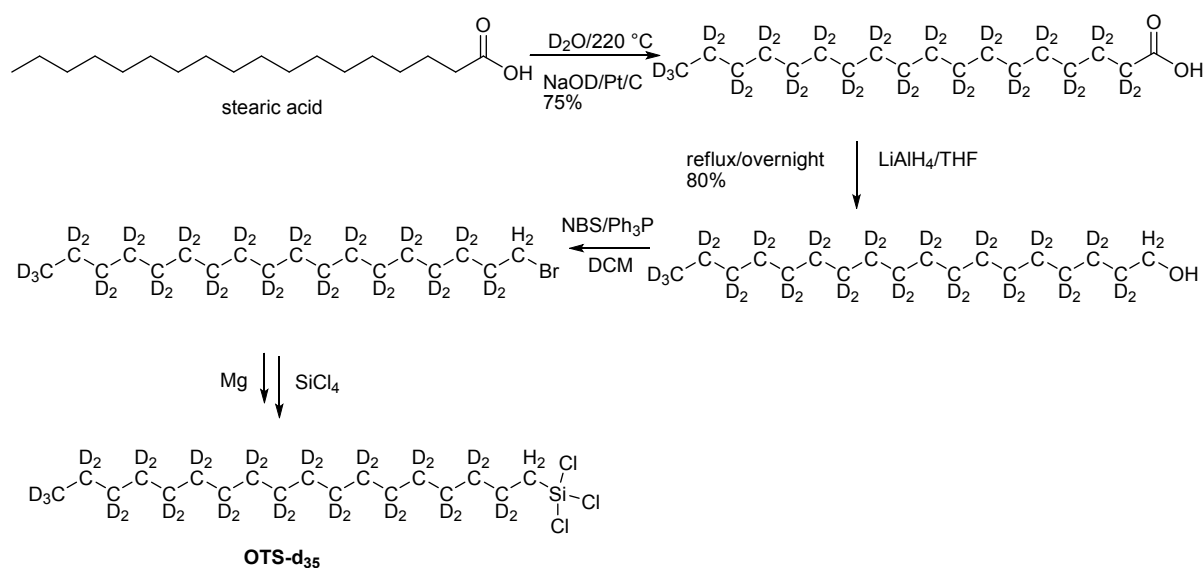

**Scheme S1.** Synthesis scheme for partially deuterated  $d_{35}$ -OTS.

Stearic acid was deuterated using hydrothermal H/D exchange procedure<sup>1</sup> according to Scheme S1. The stearic acid- $d_{35}$  was then reduced to stearyl- $d_{35}$  using  $\text{LiAlH}_4$  which placed a  $\text{CH}_2$  methylene unit at the end of the chain next to the hydroxyl group. The alcohol was converted to the corresponding bromide according to Scheme S1 which was then used to produce  $d_{35}$ -OTS according to the procedure below.

To a warm (50 °C) solution of stearyl bromide- $d_{35}$  (5.0 g, 11.8 mmol) in dry diethyl ether (25 mL) was added Mg turnings (0.85 g, 35.44 mmol) under argon atmosphere. After refluxing for 2 h the reaction mixture brought to RT. Tetrachlorosilane (10 mL) was then added at once. The reaction continued to stir at RT for overnight under argon atmosphere. Solvent and tetrachlorosilane were removed under reduced pressure and the residue was subjected to Kugelrohr distillation at 280 °C and 0.05 mm pressure to give  $d_{35}$ -OTS as a colourless viscous liquid in 50% yield. The NMR data is in an excellent agreement with that of protonated OTS from commercial sources.

**<sup>1</sup>H NMR** (CDCl<sub>3</sub>) residual protons  $\delta$  0.84 (m, 0.5H), 1.23 (m, 3.3 H), 1.40 (s, 2H, (CH<sub>2</sub>)), 1.47 (m, 0.4H), 1.55 (m, 0.2H)

**<sup>2</sup>H NMR** (CDCl<sub>3</sub>)  $\delta$  0.81 (s, 3D), 0.91-1.30 (m, 27.44D), 1.34 (m, 2.47D), 1.51 (m, 1.76D).

**<sup>13</sup>C NMR** (CDCl<sub>3</sub>)  $\delta$  13.3 (m), 21.4 (m), 24.4 (s, CH<sub>2</sub>), 28.4 (m), 29.5 (m), 30.6 (m).

**z**

## 2. Phase Correction Procedure

According to the description in the main text, the phase-sensitive SFG spectra before phase correction can be expressed as:

$$I_{PS-SFG} = \frac{E_{sample} r_{sample}^* E_{LO}^* e^{-i\omega\Delta t}}{E_{ref} r_{ref}^* E_{LO}^* e^{-i\omega\Delta t}} = E_{sample} \frac{r_{sample}^*}{E_{ref} r_{ref}^*} = |k| e^{i\phi} \chi_{sample}^{(2)} \quad (\text{Eq. 3 in main text})$$

Since the self-assembly monolayer of OTS on the fused quartz surface is a well-known system where terminal CH<sub>3</sub> group are pointed away from the substrate and the absolute orientation has been elucidated,<sup>2, 3</sup> that we performed the phase correction for the obtained complex spectra of OTS SAM to obtain the imaginary spectrum and value of  $\phi$ . The imaginary spectrum was chosen to do phase correction because it shows a symmetric spectral shape at resonance which is easier to be analysed than the real spectrum with dispersive features.

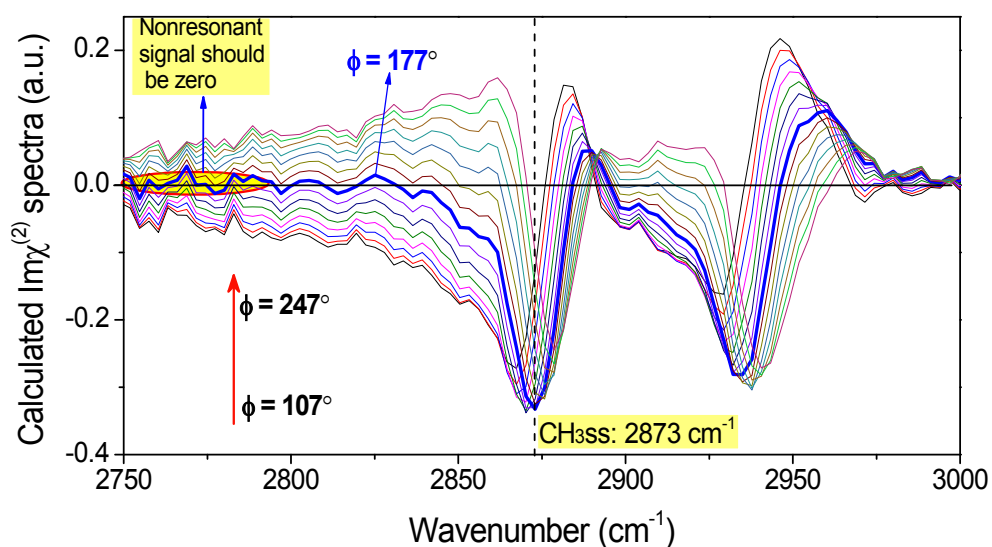

**Figure S1.** Illustration for phase correction of  $\text{Im}\chi^{(2)}$  spectrum of OTS SAM to obtain the value of  $\phi$ .

In Figure S1, different values of  $\phi$  are used to calculate the imaginary  $\chi^{(2)}$  spectra of an OTS SAM (in the figure, only the results between  $\phi = 107^\circ$  and  $\phi = 247^\circ$  are shown). It can be seen that the spectral shape of calculated  $\text{Im}\chi^{(2)}$  spectra depends on the value of  $\phi$ . The peak position of  $\text{CH}_3\text{ss}$  mode for OTS SAM is known to be  $2873\text{ cm}^{-1}$ .<sup>2</sup> Moreover, the nonresonant signal from the fused quartz substrate is believed to be real and does not contribute to the imaginary  $\chi^{(2)}$  spectrum.<sup>3</sup> Therefore, the  $\text{Im}\chi^{(2)}$  intensity should be zero in the region ( $2750\text{--}2800\text{ cm}^{-1}$ ) far from the C-H stretching region. On the basis of such knowledge, it can be seen that for the spectrum with  $\phi = 177^\circ$  should be the most likely  $\text{Im}\chi^{(2)}$  spectrum for OTS SAM (blue bold line in Figure S1). (The  $\text{CH}_3\text{ss}$  peak was chosen as negative-going to be consistent with recent phase-sensitive SFG spectra of surfactant monolayers with methyl groups pointing toward air reported by other groups<sup>3-5</sup>)

Since the value of  $\phi$  has been obtained, the  $\chi_{sample}^{(2)}$  spectra for other samples can be obtained by dividing the factor of  $e^{i\phi}$ :

$$I_{PS-SFG}^{corrected} = I_{PS-SFG} / e^{i\phi} = |k| \chi_{sample}^{(2)} \propto \chi_{sample}^{(2)} \quad (\text{Eq. 4 in the main text})$$

In this case, it is important to ensure that the heights of the OTS SAM and other samples are same, because even small height difference will significantly result in phase shift for  $\phi$ . In the present work, the above phase correction procedure has been used for the solid/air interface. However, we found the same procedure cannot be readily applied for the CaF<sub>2</sub> prism/liquid interface due to the lack of reference sample and difficulty of height measurement at the buried prism/liquid interface, so we only present the frequency-domain interferograms of the water molecules at charged solid/water interfaces. We propose that use of a CaF<sub>2</sub> plate coated with a thin layer of SiO<sub>2</sub> may overcome these problems, because the OTS SAM can be formed on the SiO<sub>2</sub> surface as a reference sample and the height of the upper surface of CaF<sub>2</sub> plate can be accurately controlled.

### **References:**

1. T. A. Darwish, E. Luks, G. Moraes, N. R. Yepuri, P. J. Holden and M. James, *J Label Compd Radiopharm*, 2013, **56**, 520.
2. N. Ji, V. Ostroverkhov, C. Y. Chen and Y. R. Shen, *J. Am. Chem. Soc.*, 2007, **129**, 10056.
3. P. A. Covert, W. R. FitzGerald and D. K. Hore, *J. Chem. Phys.*, 2012, **137**, 014201.
4. S. Nihonyanagi, S. Yamaguchi and T. Tahara, *J. Chem. Phys.*, 2009, **130**, 204704.
5. J. A. Mondal, S. Nihonyanagi, S. Yamaguchi and T. Tahara, *J. Am. Chem. Soc.*, 2012, **134**, 7842.
